# Supplementary material for: Climate-driven oscillation of phosphorus and iron limitation in the North Pacific Subtropical Gyre
Source: PubMed Central journal article supplement — Proc Natl Acad Sci U S A. 2019 Jun 10;116(26):12720–8. doi: 10.1073/pnas.1900789116 (PMC6600909; doi:10.1073/pnas.1900789116), 2019-06-10
Supplement: pnas.1900789116.sapp.pdf [file pnas.1900789116.sapp.pdf]

# Supplementary Information for

## Climate-driven oscillation of phosphorus and iron limitation in the North Pacific Subtropical Gyre

Ricardo M. Letelier, Karin M. Björkman, Matthew J. Church, Douglas S. Hamilton, Natalie M. Mahowald, Rachel A. Scanza, Niklas Schneider, Angelicque E. White, and David M. Karl

Corresponding authors: Ricardo M. Letelier & David M. Karl  
Emails: [letelier@oregonstate.edu](mailto:letelier@oregonstate.edu) & [dkarl@hawaii.edu](mailto:dkarl@hawaii.edu)

### **This PDF file includes:**

Figs. S1 to S7  
Table S1  
References for SI citations

Fig. S1.

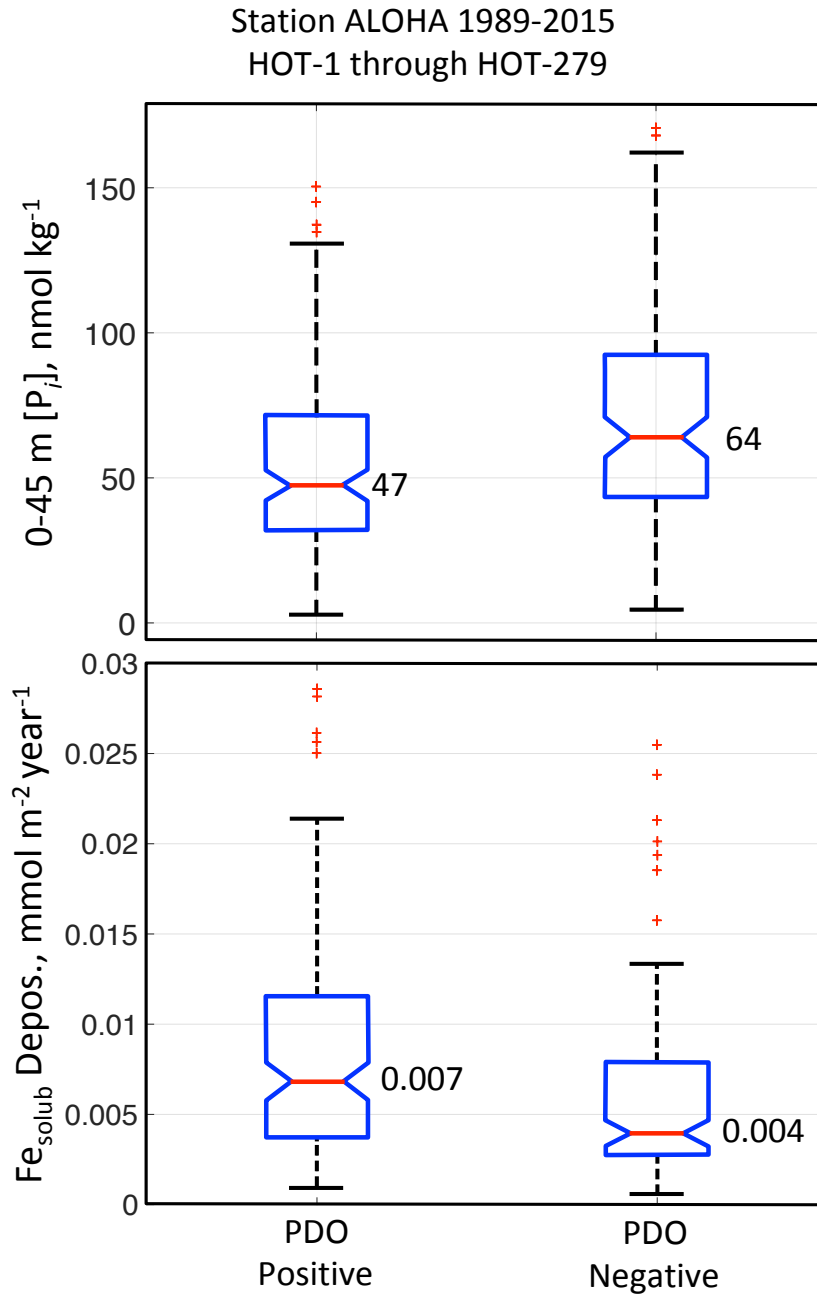

Box-and-Whisker plots displaying the median, standard error of the median (box notches), 25<sup>th</sup> and 75<sup>th</sup> percentile of 0–45 m depth P<sub>i</sub> concentration observed at Station ALOHA (upper panel) and model derived soluble Fe deposition (lower panel) during positive and negative PDO periods.

Fig. S2.

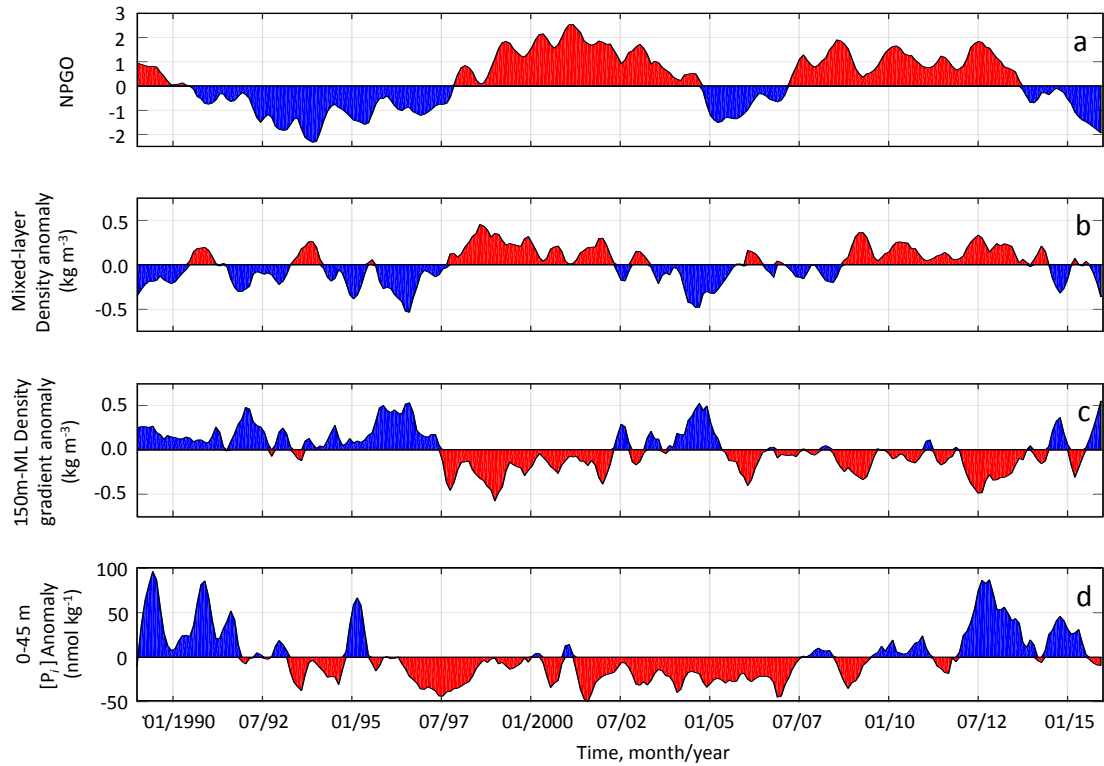

Time-series of a) the North Pacific Gyre Oscillation (NPGO) Index, b) Mixed-layer Density anomaly, c) Upper water column 0- to 150-m gradient anomaly, and d) 0-45 m depth mean  $P_i$  concentration anomaly. All anomalies correspond to residuals following the removal of the mean seasonal climatology.

**Fig. S3.**

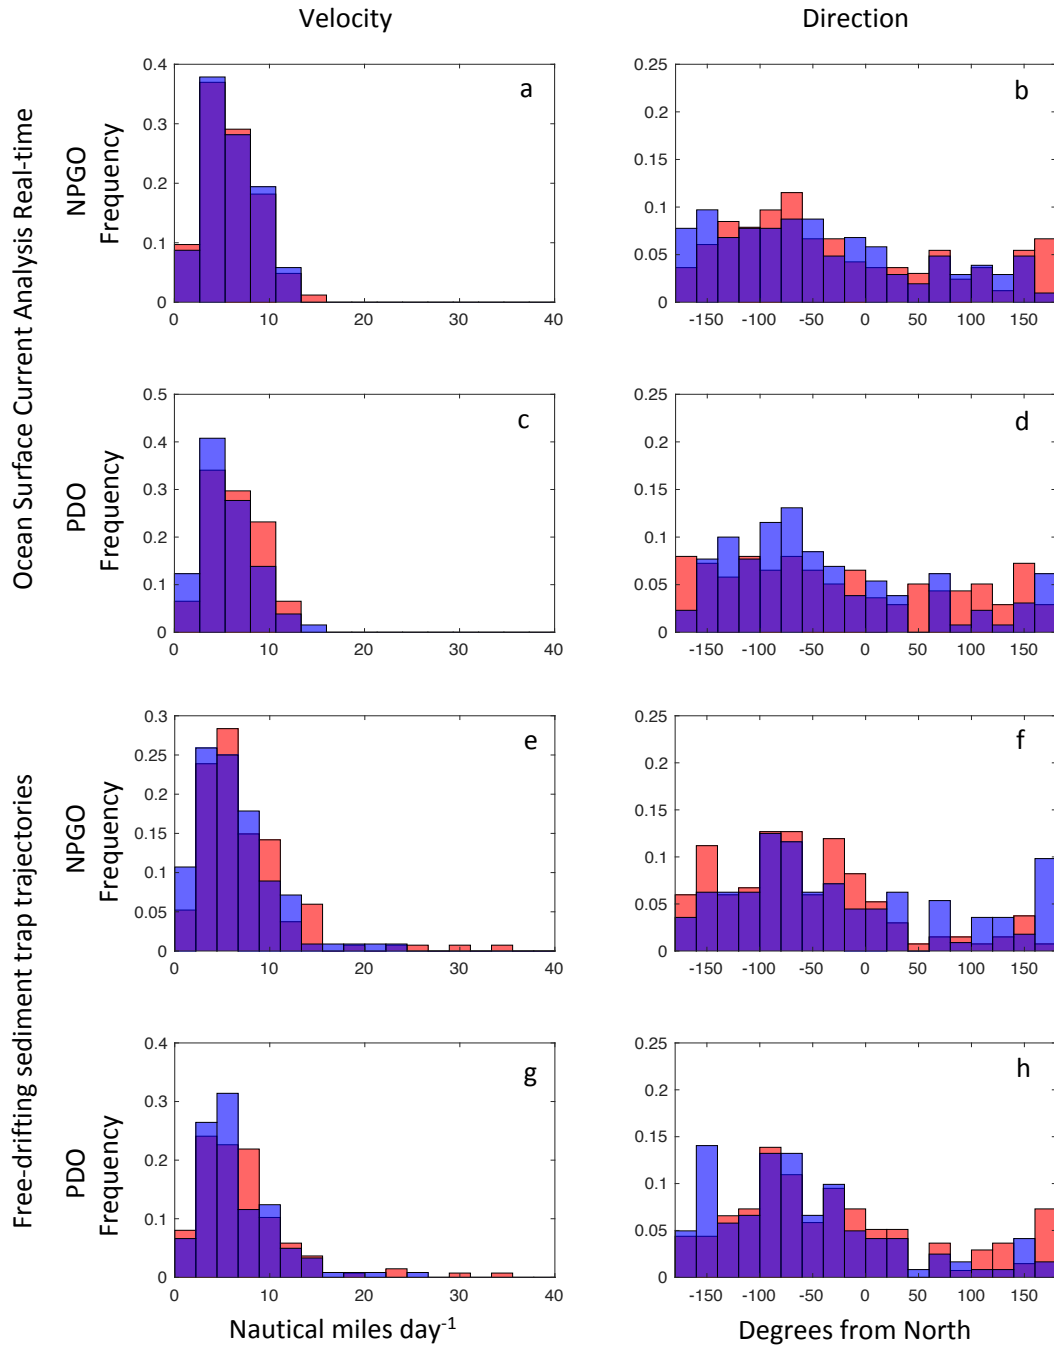

Comparison of the frequency distributions of ocean surface currents velocity (left column) and direction (right column) as a function of positive (red) and negative (blue) climate index conditions. (a, b, e and f = NPGO; c, d, g and h = PDO). Values derived from the Tropical Ocean Surface Current Analysis Real-time (OSCAR) model (1) for the region 158.2°W-156.2°W and 22.2°N-24.2°N (upper four panels) and from the drift of sediment traps deployed during HOT cruises (lower four panels).

Fig. S4.

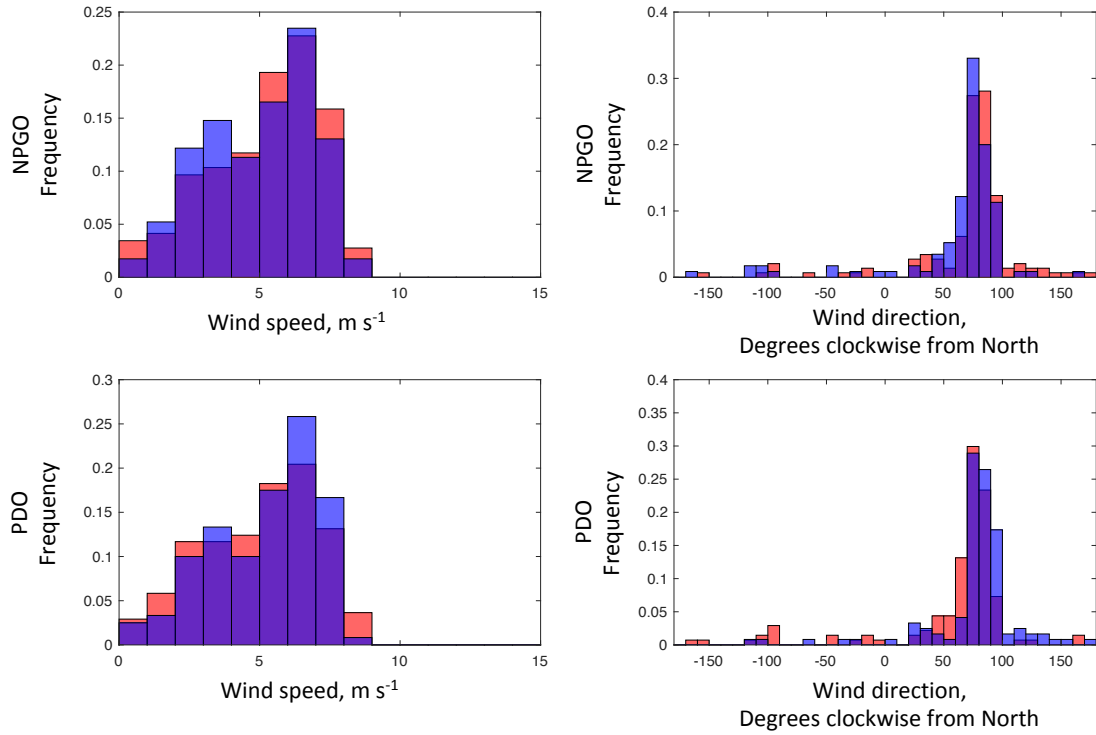

Comparison of the distributions of monthly mean wind speed and direction recorded by the NDBC buoys 51001 and 51101 between January 1989 and December 2015 as a function of positive (red) and negative (blue) climate index conditions. Upper panels = NPGO, lower panels = PDO.

Fig. S5.

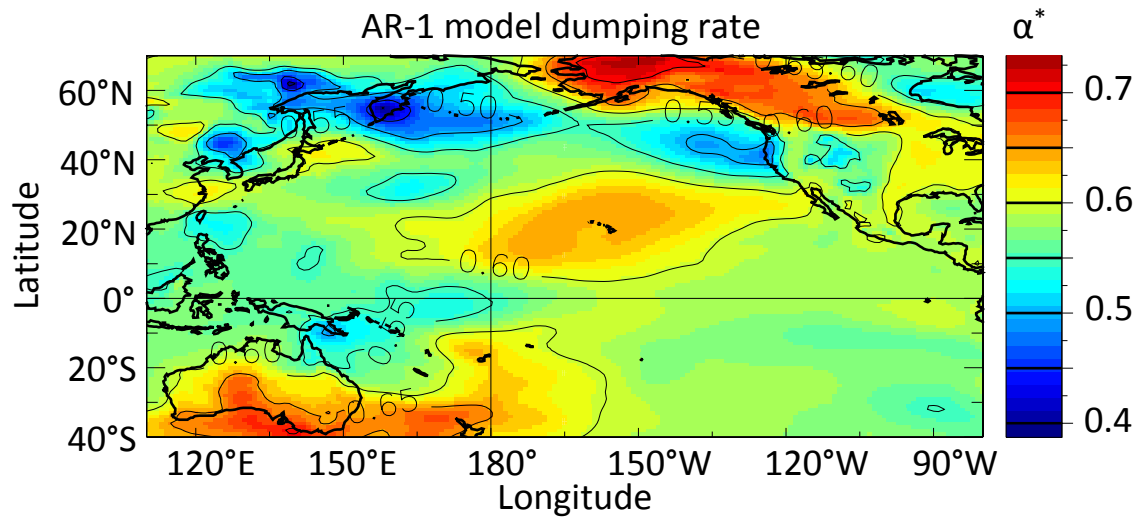

Spatial distribution of the dumping rate  $\alpha^* = 1 - \alpha \Delta t$  (see Equation 1), where  $\alpha$  corresponds to the damping time scale in years.

**Fig. S6.**

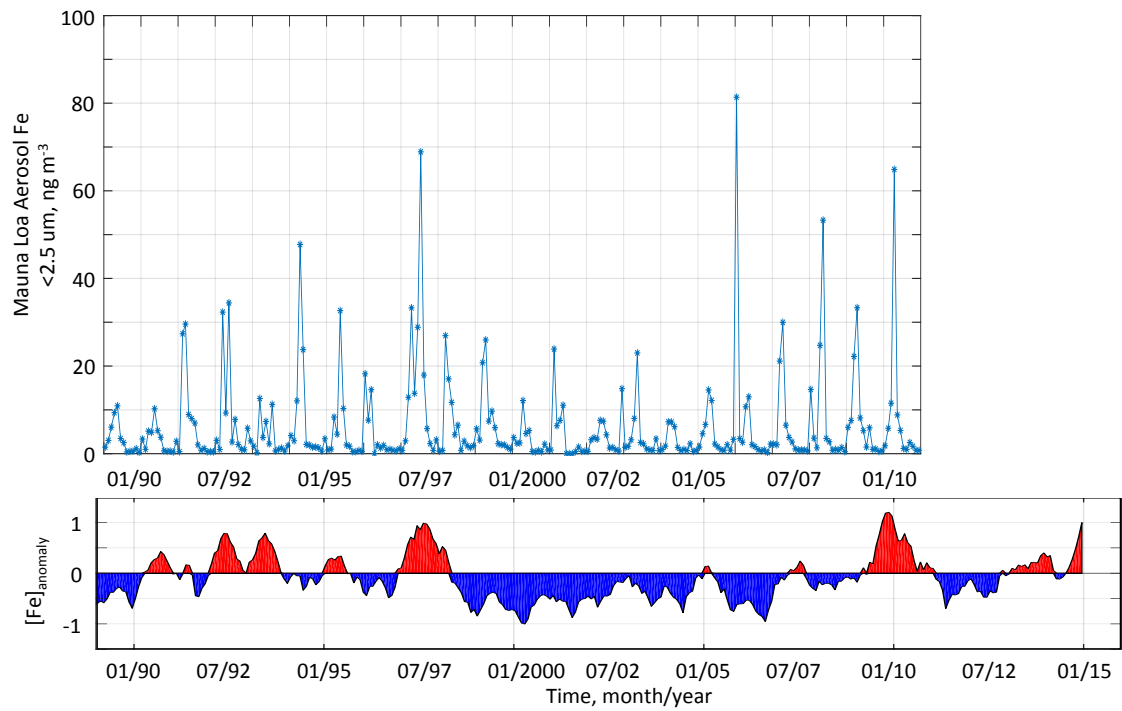

Time-series of (upper panel) monthly mean atmospheric aerosol Fe (<2.5 μm) collected at Mauna Loa Observatory between January 1989 and December 2010 (2) and (lower panel) seasonally de-trended and standardized model-derived atmospheric Fe dust concentration.

Fig. S7.

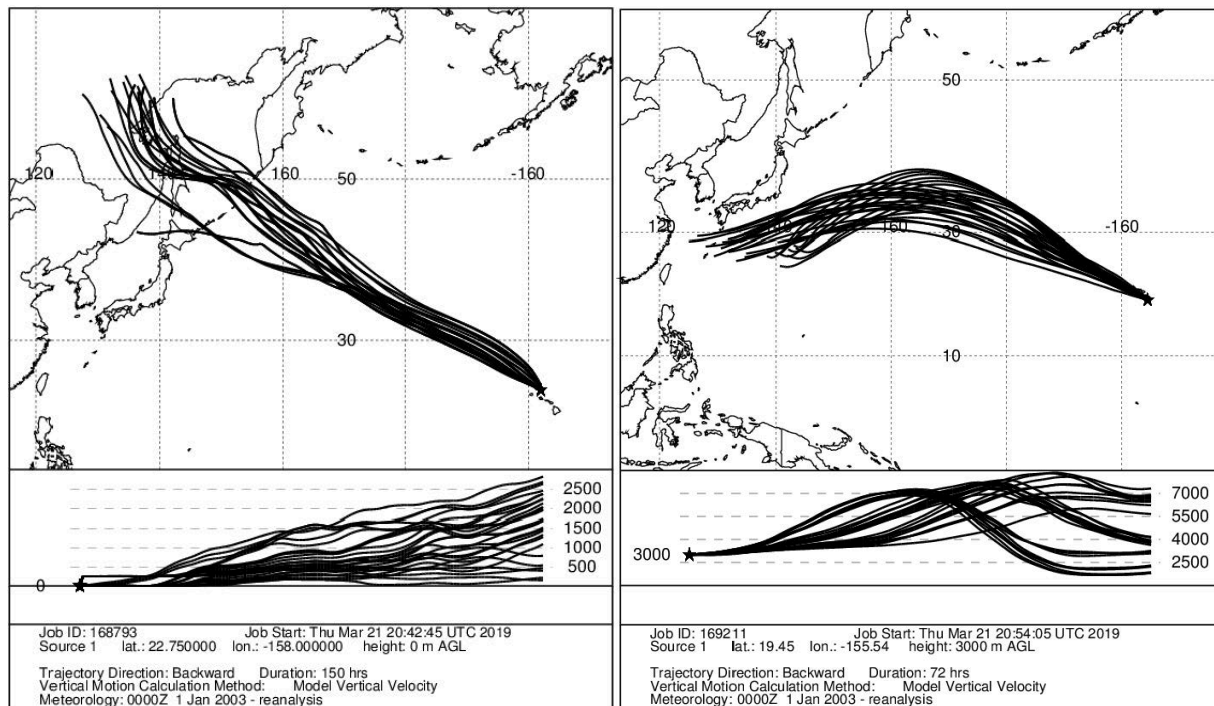

Comparison of 150 hours backtrack atmospheric particle ensemble trajectories reaching Station ALOHA (left panel) and the Mauna Loa Observatory (right panel) on January 1<sup>st</sup> 2003. Analysis based on NCEP/NCAR reanalysis using NOAA's HYSPLIT Atmospheric Transport and Dispersion Modeling System (3).



**Table S1.** Changes in the mean ( $\pm$  S.E.M.) mixed-layer condition observed at Station ALOHA during different phases of the PDO and NPGO. Anomalies are based on residuals following the removal of the 1989-2015 seasonal climatology. Statistical significance based on 1-way ANOVA.

|                                                                                          | PDO<br>(+)            | PDO<br>(-)            | Significance<br>p < | NPGO<br>(+)           | NPGO<br>(-)           | Significance<br>p < |
|------------------------------------------------------------------------------------------|-----------------------|-----------------------|---------------------|-----------------------|-----------------------|---------------------|
| 0-45 m<br>[P <sub>i</sub> ]<br>(nmol kg <sup>-1</sup> )                                  | 54.1<br>$\pm$ 2.6     | 72.5<br>$\pm$ 3.7     | <b>0.001</b>        | 64.7<br>$\pm$ 3.1     | 59.9<br>$\pm$ 3.2     | ns                  |
| 0-45 m<br>[NO <sub>3</sub> <sup>-</sup> + NO <sub>2</sub> ]<br>(nmol kg <sup>-1</sup> )  | 4.1<br>$\pm$ 0.2      | 4.2<br>$\pm$ 0.1      | n.s.                | 3.9<br>$\pm$ 0.1      | 4.4<br>$\pm$ 0.2      | <b>0.05</b>         |
| Fe <sub>solub.</sub><br>Deposition rate<br>( $\mu$ mol m <sup>-2</sup> y <sup>-1</sup> ) | 9.8<br>$\pm$ 0.7      | 6.2<br>$\pm$ 0.4      | <b>0.001</b>        | 7.0<br>$\pm$ 0.7      | 7.0<br>$\pm$ 0.6      | n.s.                |
| Mixed-Layer<br>Temperature<br>anomaly (°C)                                               | 0.11<br>$\pm$ 0.05    | -0.13<br>$\pm$ 0.05   | <b>0.001</b>        | -0.07<br>$\pm$ 0.04   | 0.09<br>$\pm$ 0.05    | <b>0.05</b>         |
| Mixed-Layer<br>Salinity anomaly<br>(o/oo)                                                | -0.032<br>$\pm$ 0.015 | 0.037<br>$\pm$ 0.017  | <b>0.01</b>         | 0.056<br>$\pm$ 0.014  | -0.071<br>$\pm$ 0.017 | <b>0.001</b>        |
| Mixed-Layer to 150m<br>Density gradient<br>anomaly (kg m <sup>-3</sup> )                 | 0.081<br>$\pm$ 0.025  | -0.085<br>$\pm$ 0.021 | <b>0.001</b>        | -0.081<br>$\pm$ 0.023 | 0.086<br>$\pm$ 0.023  | <b>0.001</b>        |
| 0-45 m<br>chl <i>a</i> anomaly<br>(mg m <sup>-3</sup> )                                  | -0.004<br>$\pm$ 0.002 | 0.005<br>$\pm$ 0.003  | <b>0.05</b>         | 0.004<br>$\pm$ 0.003  | -0.006<br>$\pm$ 0.002 | <b>0.01</b>         |
| 0-45 m<br>Primary Production<br>anomaly<br>(mg C m <sup>-3</sup> )                       | -0.114<br>$\pm$ 0.132 | 0.070<br>$\pm$ 0.162  | ns                  | 0.109<br>$\pm$ 0.144  | -0.204<br>$\pm$ 0.134 | ns                  |
| 0-45 m<br>Assimilation number<br>anomaly<br>(mg C [mg chl <i>a</i> hr] <sup>-1</sup> )   | 0.125<br>$\pm$ 0.156  | -0.129<br>$\pm$ 0.142 | ns                  | -0.060<br>$\pm$ 0.138 | 0.092<br>$\pm$ 0.167  | ns                  |

## References

1. Bonjean F, Lagerloef GSE (2002) Diagnostic model and analysis of the surface currents in the tropical Pacific Ocean. *J Phys Ocean* 32:2938-2954.
2. Hyslop NP, Trzepla K, Wallis CD, Matzoll AK, White WH (2013) Technical note: A 23-year record of twice-weekly aerosol composition measurements at Mauna Loa Observatory. *Atmos Environ* 80:259-263.
3. Stein AF, Draxler RR, Rolph GD, Stunder BJB, Cohen MD, Ngan F (2015) NOAA's HYSPLIT Atmospheric transport and dispersion modeling system. *Bull Amer meteor Soc* 96: 2059-2077.
